# Supplementary material for: Synthesis and growth kinetics of high quality InAs nanocrystals using in situ generated AsH3as the arsenic source
Source: Royal Society of Chemistry journal article supplement (doi:10.1039/b907572k), 2009-10-07
Supplement: b907572k.pdf [file b907572k.pdf]

## Supporting Information

# Synthesis and Growth Kinetics of High Quality InAs Nanocrystals Using *in situ* generated AsH<sub>3</sub> as the Arsenic Source

Jianbing Zhang and Daoli Zhang,\*

Department of Electronic Science and Technology, Huazhong University of Science and Technology, 1037 Luoyu Road, Hongshan District, Wuhan City, Hubei Province 430074, P. R. China

\*Corresponding author: zhang\_daoli@mail.hust.edu.cn

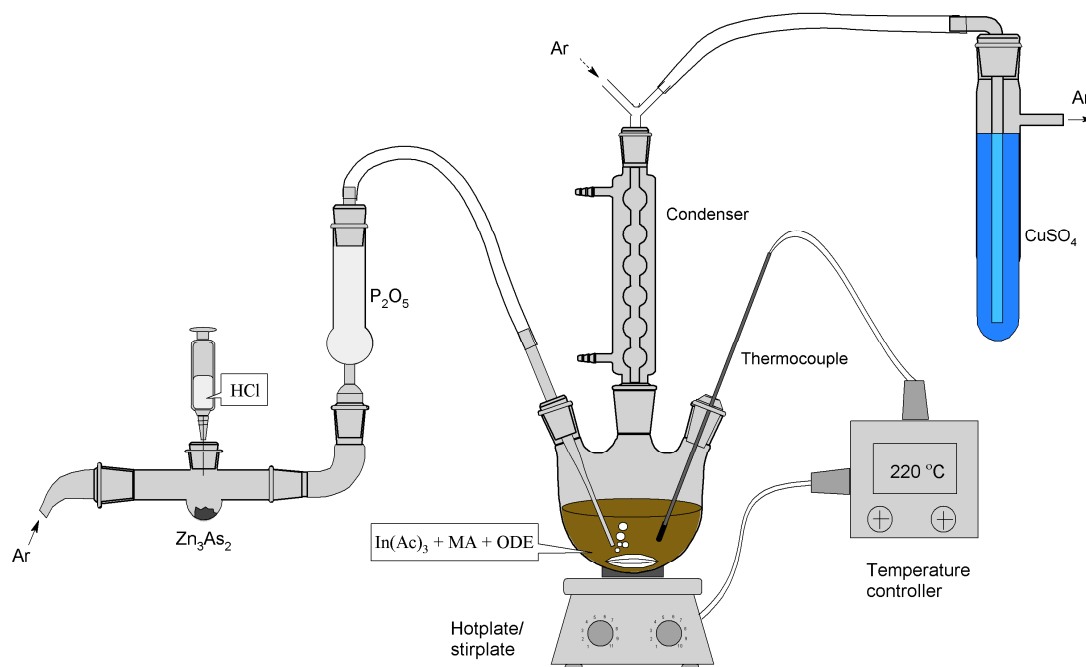

Figure S1. Experimental setup for the synthesis of InAs and InAs/ZnS nanocrystals.

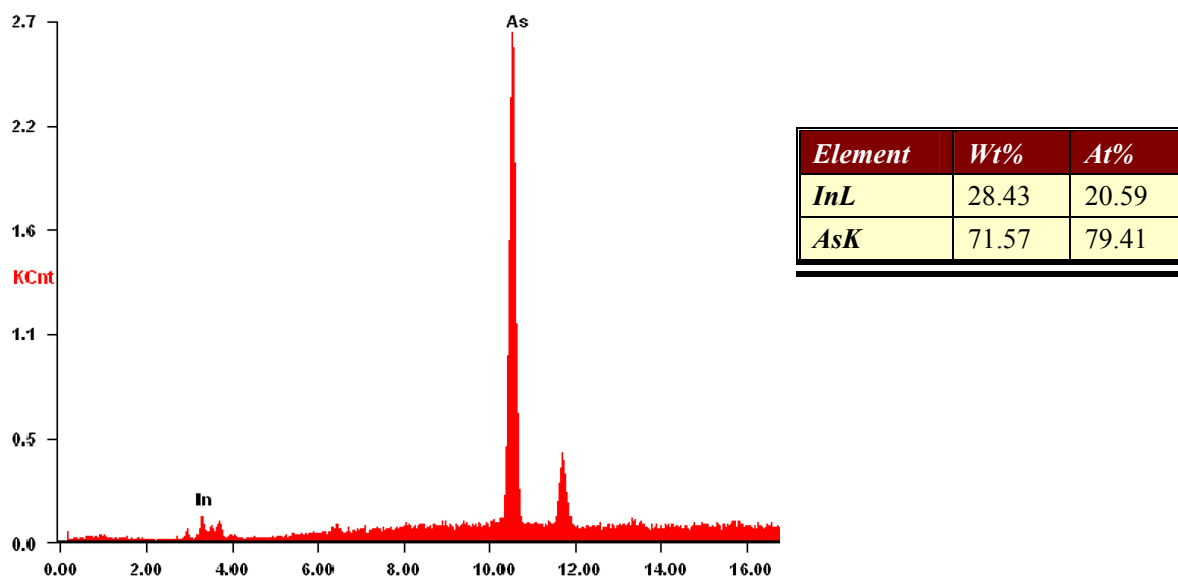

Figure S2. The XRF spectrum of the ultimate black deposition in the synthesis of InAs without the presence of zinc stearate.
